# Supplementary material
Source: Springer Nature journal article supplement (https://www.springermedizin.de/resource/supplementary/13012_2013_724_MOESM1_ESM.pdf/9630646)
Supplement: MOESM1 [file 9630646]

# PAR SPIRAL INTERVENTION

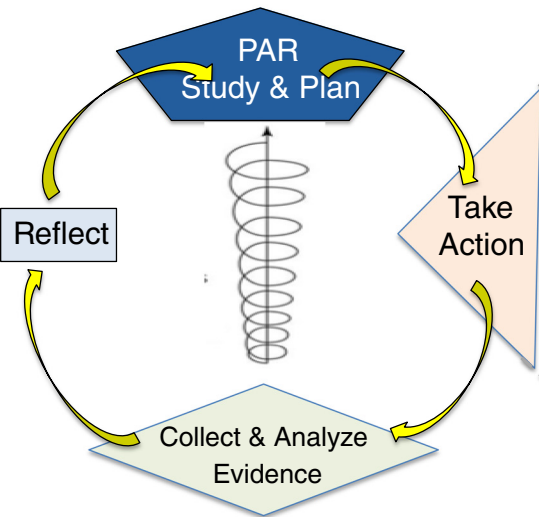

Education

Communication

Reflection on practice

Coaching/Mentoring

Conducting 15 staff-led specific QI training projects

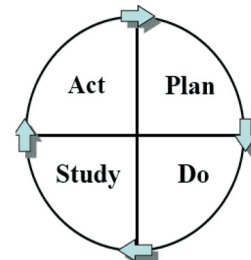

- Staff-led QI training projects –success? Challenges?
- Use of communication infrastructure and dashboard?
- Activity of the PQIS Team?

- Frontline staff leadership & engagement?
- Satisfaction?
- Functional networks
